# Supplementary material for: SUSD2 Proteolytic Cleavage Requires the GDPH Sequence and Inter-Fragment Disulfide Bonds for Surface Presentation of Galectin-1 on Breast Cancer Cells
Source: Int J Mol Sci. 2019 Aug 5;20(15):3814. doi: 10.3390/ijms20153814 (PMC6696261; doi:10.3390/ijms20153814)
Supplement: Supplementary file 1 [file ijms-20-03814-s001.pdf]

# Supplementary Materials:

**Table S1.** Sequence of primers used for *SUSD2* mutagenesis.

| Constructs  | Primer Sequences                                                                                          |
|-------------|-----------------------------------------------------------------------------------------------------------|
| SUSD2-ECD   | For 5'-GGACGCAGCTACGCGTAAGTGCTGTTGGGCATC-3'<br>Rev 5'-GATGCCCAACAGCACTTACGCGTAGCTGCGTCC-3'                |
| SUSD2 ER    | For 5'-CCGGTCATCATCACCATAAAAAGCACCATTGAGTTTAAACC-3'<br>Rev 5'-GGTTTAAACTCAATGGTGCTTTTATGGTGATGATGACCGG-3' |
| SUSD2-ΔGDPH | For 5'-CTGGCCTCCGCCTTCTTTGTGACCTTCGAC-3'<br>Rev 5'-GTCGAAGGTCACAAAGAAGGCGGAGGCCAG-3',                     |
| SUSD2-GEPH  | For 5'-CTCCGCCTTCGGAGAGCCACACTTTGT-GACC-3'<br>Rev 5'-GGTCACAAAGTGTGGCTCTCCGAAGGCGGAG-3'                   |
| SUSD2-GDAH  | For 5'-CTCCGCCTTCGGAGAGCCACACTTTGTGACC-3',<br>Rev 5'-GGTCACAAAGTGTGCGTCTCCGAAGGCGGAG-3'                   |
| SUSD2-GAPH  | For 5'-CCTCCGCCTTCGGAGCCCCACACTTTGTGAC-3'<br>Rev 5'-GTCACAAAGTGTGGGGCTCCGAAGGCGGAGG-3'                    |
| SUSD2-C95A  | For 5'-GACGCCAGTGTGATCGCCAGGTTTAAGGACAG-3'<br>Rev 5'-CTGTCCTTAAACCTGGCGATCACACTGGCGTC-3',                 |
| SUSD2-C115A | For 5'-CTCCGGGCAAGTGCACGCTGTGTACCTCTGCTC-3'<br>Rev 5'-GAGCAGAGGTGACACAGCGTGCACTTGCCCGG-AG-3',             |
| SUSD2-C683A | For 5'-GAGGCAGCCAAACTAGCTGGGGACGATCATTTTC-3'<br>Rev 5'-GAAATGATCGTCCCCAGCTAGTTTGGCTGCCTC-3',              |
| SUSD2-C689A | For 5'-GGGGACGATCATTTTCGCCAACTTTGATGTGGC-3'<br>Rev 5'-GCCACATCAAAGTTGGCGAAATGATCGTCCCC-3'                 |
| SUSD2-C725A | For 5'-CAGCCAGTGGTGTCCGCTGGCTGGCTGGCCCC-3';<br>Rev 5'-GGGGCCAGCCAGCCAGCGGACACCACTGGCTG-3'                 |
| SUSD2-C751A | For 5'-CACCATCTACTTCCACGCTGACAACGGCTACAGC-3'<br>Rev 5'-GCTGTAGCCGTTGTCAGCGTGGAAGTAGATGGTG-3'              |
| SUSD2-C765A | For 5'-GCAGAGACCAGCACCGCCAGGCTGACGGCAC-3'<br>Rev 5'-GTGCCGTCAGCCTGGGCGGTGCTGGTCTCTGC-3'                   |
| SUSD2-C778A | For 5'-CTACCCACCCCGAAGGCCAGCCAGGACGCAGC-3'<br>Rev 5'-GCTGCGTCCTGGCTGGGCCTTCGGGGTGGGTGAG-3'                |

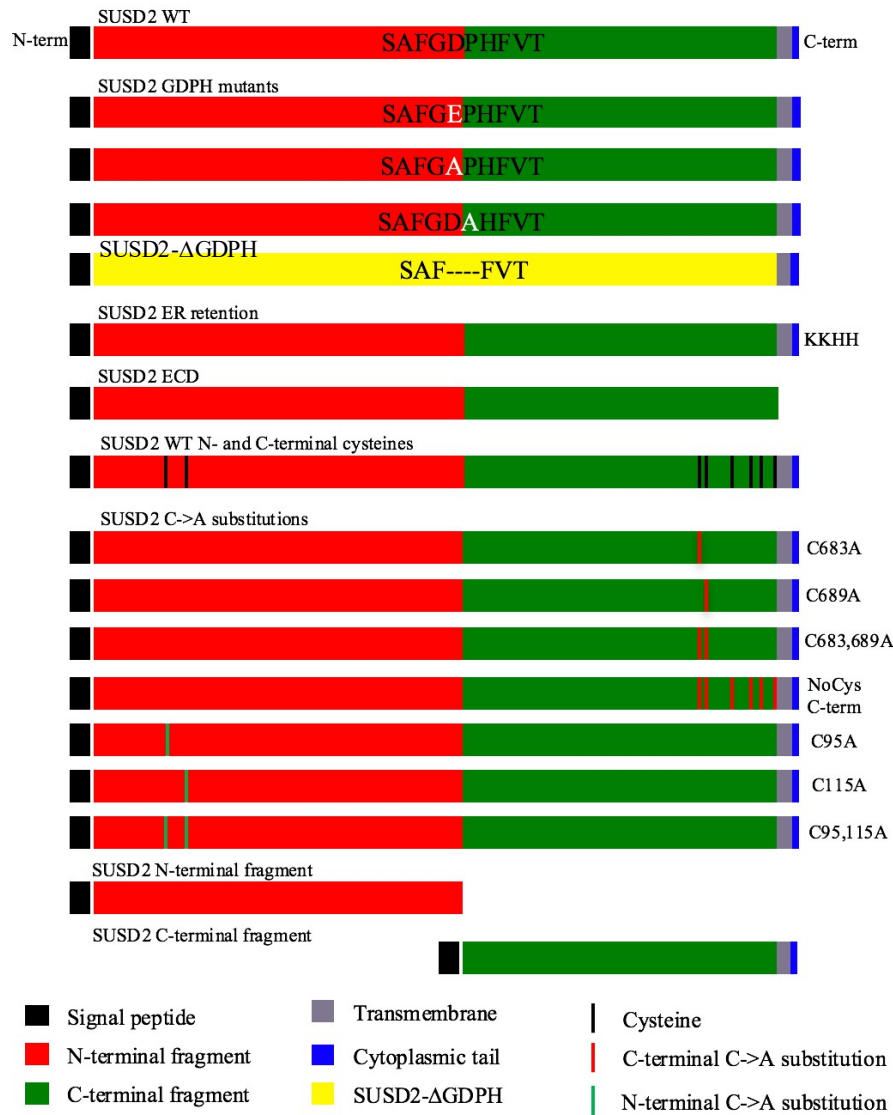

Figure S1

**Figure S1.** Diagram of SUS D2 mutant constructs. Shown is a representation of the SUS D2 protein encoded by the mutant plasmids used in this study. Regions are shown in proportion to the length of their protein sequence. The red, green, and yellow colors represent fluorescence of the anti-N- and anti-C-terminal SUS D2 antibodies used with the LI-COR imaging platform. All mutants were generated using site-directed mutagenesis with the exception of the C-terminal SUS D2 fragment, which was synthesized by Genscript. *pFLAG-SUS D2-myc* was also generated by Genscript and was the template for mutagenesis that generated the SUS D2 cysteine mutants.

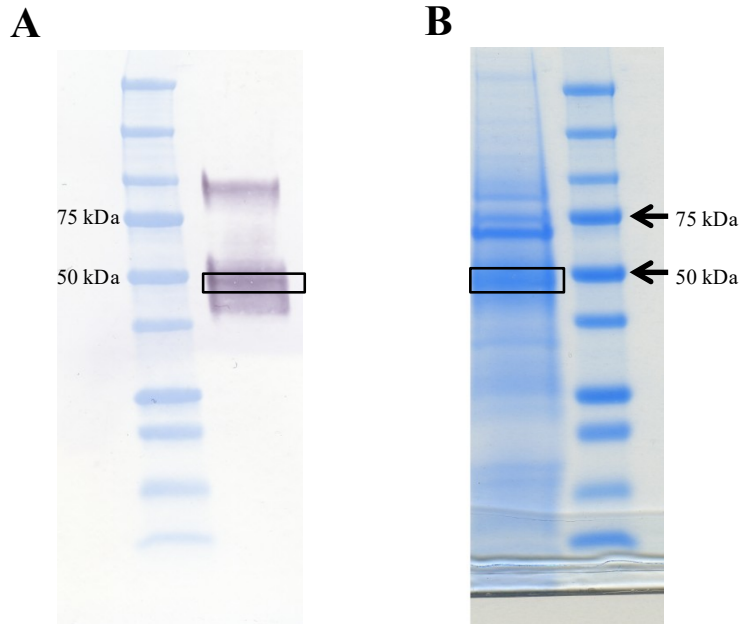

Figure S2

**Figure S2.** Isolation of SUS D2 C-terminal fragment for Edman sequencing. Expi293 cells were transiently transfected with pSUS D2-ECD (extra-cellular domain). Supernatants were harvested, separated by SDS-PAGE and transferred to PVDF membranes. **(A)** Western immunoblot analysis of SUS D2 extracellular domain using an anti-C-terminal SUS D2 antibody. **(B)** PVDF membrane stained with Coomassie Brilliant Blue. The band for Edman sequencing was harvested from this membrane.

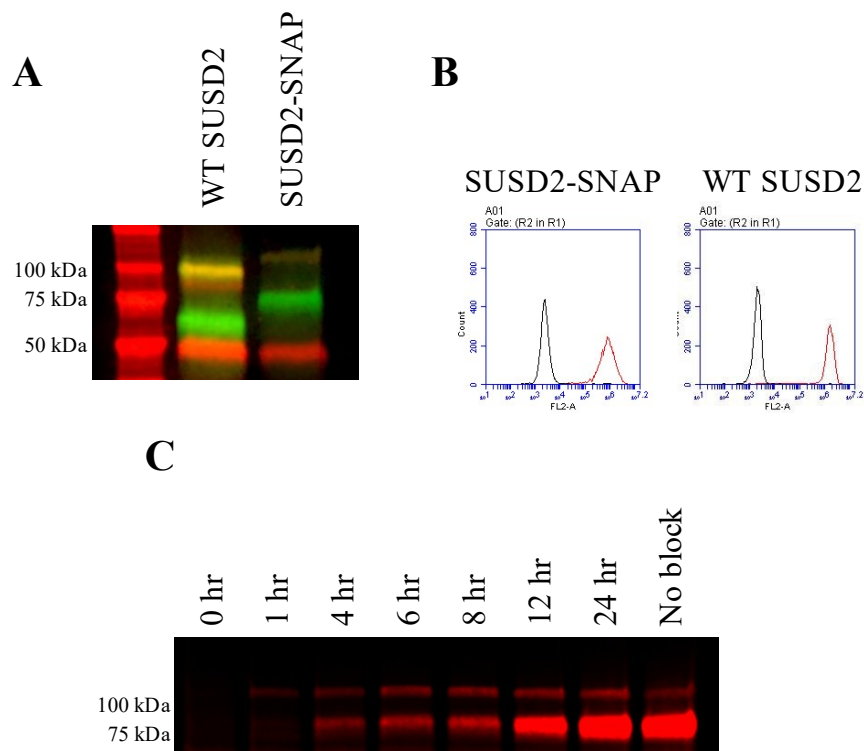

Figure S3

**Figure S3.** Characterization of SUS D2-SNAP fusion and pulse-chase analysis of SUS D2-SNAP production. (A) SUS D2-SNAP was cleaved similarly to WT SUS D2. 293T cells were transiently transfected with p*SUS D2-SNAP* and analyzed by western immunoblot analysis using anti-N-terminal (red) and anti-C-terminal (green) SUS D2 antibodies. (B) SUS D2-SNAP localized to the cell surface. Stable MDA-MB-231-SUS D2-SNAP cells were analyzed by flow cytometry for cell surface localization of SUS D2-SNAP. The red line indicates cell surface SUS D2 or SUS D2-SNAP and the black line is the 2° antibody negative control. (C) Pulse-chase analysis of SUS D2 production. Stable MDA-MB-231-SUS D2-SNAP cells were blocked with bromothenylpteridine (BTP) for 30 min followed by incubation to allow production of nascent SUS D2. A dish of cells was harvested at each indicated time point. The derived cell lysates were labeled with SNAP-surface 682 and separated by SDS-PAGE, transferred to PVDF membrane and imaged using LI-COR Odyssey Fc.

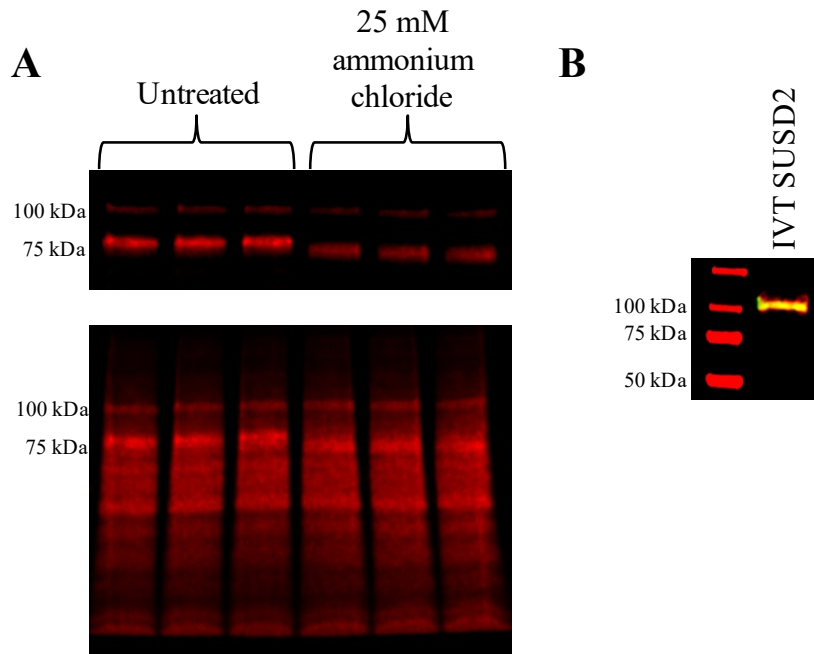

Figure S4

**Figure S4.** pH neutralization does not inhibit SUS D2 cleavage. (A) Fluorescence imaging of pulse-chase analysis (top) and REVERT total protein stain (bottom) of MDA-MB-231-SUS D2-SNAP cell lysates after neutralization of the secretory pathway using ammonium chloride. Existing SUS D2-SNAP was blocked with bromothenylpteridine (BTP), and cells were incubated for 6 h in the presence of 25 mM ammonium chloride before harvest. Harvested lysates were labeled with SNAP-surface 682 and imaged using Odyssey Fc imager. After pulse-chase imaging, the membrane was stained with REVERT total protein stain (LI-COR) and re-imaged. Samples were run in triplicate. (B) Western immunoblot analysis of recombinant SUS D2 produced by in vitro transcription/translation (IVT SUS D2) using anti-N- and anti-C-terminal SUS D2 antibodies. IVT SUS D2 was run on SDS-PAGE gel, transferred to PVDF membrane and labeled with SUS D2 primary antibodies. IRDye-labeled secondary antibodies were used to detect N-terminal (700 red) and C-terminal (800 green) primary antibodies.
